# Supplementary material for: Assistive technologies for ageing populations in six low-income and middle-income countries: a systematic review
Source: PubMed Central journal article supplement — BMJ Innov. 2015 Sep 11;1(4):182–95. doi: 10.1136/bmjinnov-2015-000065 (PMC4680721; doi:10.1136/bmjinnov-2015-000065), 2015-09-11
Supplement: bmjinnov-2015-000065-s1.pdf [file bmjinnov-2015-000065-s1.pdf]

## APPENDICES

### APPENDIX A

#### Populations Statistics

**Table 1: 65+ Population Statistics in Six Countries**

| Country  | 65+ population in 2000<br>~(million) | 65+ population by<br>2050 ~(million) | 65+ population by 2100<br>~(million) |
|----------|--------------------------------------|--------------------------------------|--------------------------------------|
| India    | 50                                   | 200                                  | 360                                  |
| Brazil   | 10                                   | 53                                   | 64                                   |
| Turkey   | 3.5                                  | 20                                   | 27.5                                 |
| Egypt    | 3.0                                  | 14                                   | 34                                   |
| Zimbabwe | 0.5                                  | 2.0                                  | 7.5                                  |
| Cambodia | 0.5                                  | 1.35                                 | 7.0                                  |

**Table 2: Estimated 65 + Population by 2050 and 2100**

| Country                     | In 2000~ (millions) | By the year 2050<br>~(millions) | By the year 2100<br>~(millions) |
|-----------------------------|---------------------|---------------------------------|---------------------------------|
| <b>SEA</b>                  |                     |                                 |                                 |
| India                       | 50                  | 200                             | 360                             |
| Bangladesh                  | 15                  | 32                              | 57                              |
| Thailand                    | 4.0                 | 18.5                            | 13                              |
| Nepal                       | 1.0                 | 4.5                             | 9.8                             |
| Sri Lanka                   | 1.2                 | 4.2                             | 6.0                             |
| <b>PAHO</b>                 |                     |                                 |                                 |
| Brazil                      | 10                  | 53                              | 64                              |
| Mexico                      | 5.0                 | 32                              | 48                              |
| Argentina                   | 4.0                 | 10                              | 14.5                            |
| Haiti                       | 0.3                 | 1.4                             | 3.1                             |
| Cuba                        | 1.1                 | 3.3                             | 2.0                             |
| <b>EURO</b>                 |                     |                                 |                                 |
| Turkey                      | 3.5                 | 20                              | 27.5                            |
| Ukraine                     | 6.6                 | 7.5                             | 5.0                             |
| Kazakhstan                  | 1.0                 | 2.5                             | 4.0                             |
| Romania                     | 3.0                 | 5.0                             | 3.6                             |
| Hungary                     | 1.5                 | 2.3                             | 2.1                             |
| <b>AFRO</b>                 |                     |                                 |                                 |
| Zambia                      | 1.0                 | 1.0                             | 12                              |
| Zimbabwe                    | 0.5                 | 2.0                             | 7.5                             |
| Malawi                      | 0.25                | 2.0                             | 11                              |
| Central African<br>Republic | 0.2                 | 0.5                             | 2.2                             |
| <b>EMRO</b>                 |                     |                                 |                                 |
| Egypt                       | 3.0                 | 14.0                            | 34.0                            |
| Tunisia                     | 0.6                 | 3.0                             | 3.6                             |
| Lebanon                     | 0.25                | 1.35                            | 1.6                             |

|             |       |       |       |
|-------------|-------|-------|-------|
| <b>WPRO</b> |       |       |       |
| Cambodia    | 0.5   | 3.5   | 7.0   |
| Tonga       | 0.006 | 0.014 | 0.040 |

## APPENDIX B

### DEFINITIONS

**ADLs** - A concept of functioning – activities of daily living are basic activities that are necessary to independent living, including eating, bathing and toileting. This concept has several assessment tools to determine an individual’s ability to perform the activity with or without assistance.<sup>38</sup>

**IADLs** - Activities with aspects of cognitive and social functioning, including shopping, cooking, doing housework, managing money and using the telephone.<sup>38</sup>

### Appendix C

#### UN Convention on the Rights of Persons with Disabilities (CRPD)

179 WHO Member States around the world have ratified the UN Convention on the Rights of Persons with Disabilities (CRPD) since 2007. UNCRPD was adopted on 13 December 2006 during the sixty-first session of the General Assembly by resolution A/RES/61/106. In accordance with its article 42, the Convention was open for signature by all States and by regional integration organizations at UN headquarters in New York on 30 March 2007. The CRPD committed nation-states to providing legal equity, physical, political, social and economic access, and enabling conditions to allow for full participation in society. Listed are the articles in the convention that specifically refer to assistive technology or accessibility in some form.

- Article 4, Sections 1(g) and (h): Section 1(g) refers to states’ commitment to undertake or promote research and development of, and to promote the availability and use of new technologies, including information and communications technologies, mobility aids, devices and assistive technologies, suitable for persons with disabilities, giving priority to technologies at affordable costs. Section 1(h) commits states to providing accessible information to persons with disabilities about mobility aids, devices and assistive technologies, including new technologies, as well as other forms of assistance, support services and facilities.<sup>35</sup>
- Article 9, Section 2(g) and (h) commit states to promoting the design, development, production, and distribution of accessible ICTs at an early stage, such that these technologies become accessible at a minimal cost.<sup>35</sup>
- Article 20, Section (b) commits states to facilitating access to quality mobility aids, devices, and assistive technologies and forms of live assistance and intermediaries, including by making them available at affordable cost for persons with disability.<sup>35</sup>
- Article 21 Section (b) commits states to facilitate augmentative and alternative communication (AAC). Section (c) commits states to urging private entities with an internet presence to providing information in accessible and usable formats. <sup>35</sup>
- Article 26, Section 3 requires that states promote the availability, knowledge and use of assistive devices and technologies, designed for persons with disabilities, as they relate to habilitation and rehabilitation. <sup>35</sup>
- Article 28, Section 1(a) commits states to ensuring equal access by persons with disabilities to clean water services, and to ensure access to appropriate and affordable services, devices and other assistance for disability-related needs.
- Article 29, Section (ii) requires that states facilitate assistive technologies for the voting process.
- Article 32, Section (d) commits states to providing technical and economic assistance, including by facilitating access to and sharing of accessible and assistive technologies, and through the transfer of technologies.

### Appendix D

#### TYPES OF AIDS/APPLIANCES TO BE PROVIDED by ADIP Scheme

**LOCOMOTOR DISABLED**

- I. All types of prosthetic and orthotic devices.
- II. Mobility aids like tricycles, wheelchairs, crutches walking sticks and walking frames/rollators. Motorised tricycles for persons with locomotor disability that are likely to cost more than US \$100.46 may be procured and provided in exceptional cases subject to prior approval of Ministry of Social Justice and Empowerment on case to case basis. Extent of subsidy would however continue to be US \$100.46 for all other devices ceiling is US \$100.46
- III. All types of surgical footwear and MCR chappals.
- IV. All types of devices for ADL (activity of daily living).

**VISUALLY DISABLED**

- I. Learning equipment like arithmetic frames, abacus, geometry kits etc. Giant Braille dots system for slow-learning blind children. Dictaphone and other variable speed recording system. CD player/tape recorder for blind student from X standard.
- II. Science learning equipment like talking balances, talking thermometers, measuring equipment like tape measures, micrometers etc.
- III. Braille writing equipment including Brailers, Braille shorthand machines, typewriters for blind students from X class. Talking calculators, Geography learning equipment like raised maps and globes.
- IV. Communication equipment for the deaf-blind. Braille attachments for telephone for deaf-blind persons.
- V. Low vision aids including hand-held stand, lighted and unlighted magnifiers, speech synthesizers or Braille attachments for computers.
- VI. Special mobility aids for visually disabled people with muscular dystrophy or cerebral palsy like adapted walkers.
- VII. Software for visually handicapped persons using computers that are likely to cost more than US \$100.46 may be procured and provided in exceptional cases subject to prior approval of Ministry of Social Justice and Empowerment on case to case basis. For all other devices ceiling is US \$100.46.

**HEARING DISABLED**

- I. Various types of hearing aids.
- II. Educational kits like tape recorders / CD players etc.
- III. Assistive and alarming devices including devices for hearing of telephone, TV, doorbell, time alarm etc.
- IV. Communication aids, like, portable speech synthesizer etc.

**MENTALLY DISABLED**

- I. Any suitable device as advised by Rehabilitation Professional or treating physician.

**Appendix E****Overview of Associations and Services provided in Cambodia**

| <b>In Phnom Penh</b>                                                  |                                                  |
|-----------------------------------------------------------------------|--------------------------------------------------|
| <b>Source</b>                                                         | <b>Services</b>                                  |
| The Association to Aid the Refugees Cambodian Committee               | Wheelchair production                            |
| Cambodia Trust                                                        | Fitting                                          |
| Handicap International                                                | Prosthetic feet production                       |
| International Committee of the Red Cross (ICRC)                       | Components for prostheses                        |
| Veteran International                                                 | Fitting, Prosthetic feet and wheelchairs         |
| <b>Outside of Phnom Penh</b>                                          |                                                  |
| American Red Cross in Kam Pong Speu                                   | Fitting                                          |
| Catholic Office for Emergency Relief and Refugee in Banteay Mean Chei | Fitting                                          |
| Cambodia Trust in Sihanoukville and Kam Pong Chang                    | Fitting                                          |
| Handicap International in Siem Reap, Pur Sat, Kam                     | Fitting, production of crutches, wheelchairs and |

|                                                     |                                                    |
|-----------------------------------------------------|----------------------------------------------------|
| Pong Cham, Kam Pong Thom, Takeo and Kam Pot         | tricycles, runs a National Centre for Paraplegics  |
| The ICRC in Battambang                              | Fitting                                            |
| Jesuit Refugee Services in Kan Dal province         | Wheelchairs and tricycles, nationwide distribution |
| Veterans International in Stong Treng and Prey Veng | Fitting, wheelchair production                     |

## Appendix F

### Science and Technology Interventions 2010 Indicatives, India

- The development of simple solutions/assistive devices for the elderly population in the urban/semi-urban/rural areas;
- Modulation of already existing technology specific for use of elderly to suit Indian conditions;
- Development of technology package for healthcare of elderly to include preventive care in:
  - Cognitive support for elderly (Alzheimer/Parkinson/Dementia)
  - Cost effective visual/hearing aids, dentures/dental implants, etc.
  - Documentation and validation of traditional health practices for elderly
- Safe Kitchens for the elderly;
- The development of assistive devices for improving functionality, cognitive/assisted safety measures, monitoring devices/non-invasive measuring devices/systems (injury preventions, standing and balance training), assistive devices for frequently occurring musculoskeletal problems such as Osteoarthritis of knee, ankle joints and the osteoporosis, special devices/footwear for Diabetic foot and care, automated pill boxes, devices/programmes for fitness of elderly, and simply controlled devices for operating household devices.

## Appendix G

**Table 6: Price comparison of commercial and newly developed products.**

| Product                      | Price of Commercial Product (\$US)        | Price of IFRS and Ceará Product (\$US)                                                   |
|------------------------------|-------------------------------------------|------------------------------------------------------------------------------------------|
| Braille Display              | 4,000.00                                  | 1,000.00                                                                                 |
| Button Mouse                 | 300.00                                    | 20.00                                                                                    |
| Audio Transmitter            | 1,700.00                                  | Software based; can be used in any Android device, distributed for free through internet |
| Capacitive Driver            | No similar device commercially available. | 20.00                                                                                    |
| Cane Tip for Water Detection | No commercial equivalent is known.        | 20.00                                                                                    |

## APPENDIX H

### ACRONYMS AND ABBREVIATIONS

|          |                                                                         |
|----------|-------------------------------------------------------------------------|
| ADIP     | Assistance to Disabled Persons for Purchase/Fitting of Aids/Appliances  |
| AARP     | American Association of Retired Persons                                 |
| ADL      | Activities of Daily Living                                              |
| AIM      | African Index Medicus                                                   |
| ALIMCO   | Artificial Limb Manufacturing Company                                   |
| AT       | Assistive Technology                                                    |
| AAC      | Augmentative and Alternative Communication                              |
| DPF      | Disabled Persons Fund                                                   |
| EJAD     | Egypt-Japan Assistive Device                                            |
| EMLIBNET | Eastern Mediterranean Region Library Network                            |
| IADL     | Instrumental Activities of Daily Living                                 |
| IMSEAR   | Index Medicus for South-East Asia Region                                |
| HIC      | High-Income Country                                                     |
| LMIC     | Low- and Middle-Income Country                                          |
| N/A      | Not Available or Not Applicable                                         |
| OP CRPD  | Optional Protocol Convention on the Rights of Persons with Disabilities |
| P&O      | Prosthetics and Orthotics                                               |
| PAHO     | Pan American Health Organization                                        |
| PPRPD    | Protection and Promotion of the Rights of Persons with Disabilities     |
| PWDi     | Person with Disability                                                  |
| RCT      | Randomized Controlled Trial                                             |
| SINTEF   | The Foundation for Scientific and Industrial Research                   |
| UN CRPD  | UN Convention on the Rights of Persons with Disabilities                |
| WHO      | World Health Organization                                               |
| WHO HQ   | WHO Headquarters (Geneva)                                               |
| WHOLIS   | WHO Library Database                                                    |
| WKC      | WHO Kobe Centre                                                         |
| WPRIM    | Western Pacific Region Index Medicus                                    |
| YLD      | Years Lived with Disability                                             |
